# Supplementary material
Source: Springer Nature journal article supplement (https://www.springermedizin.de/resource/supplementary/12891_2014_2047_MOESM4_ESM.pdf/9510170)

A.

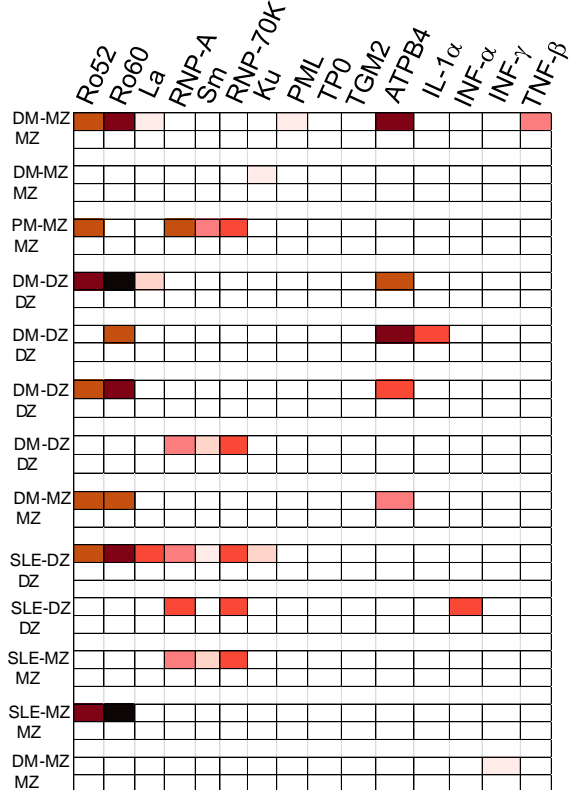

**Fold Above Normal**

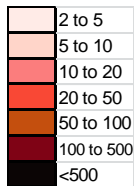

B.

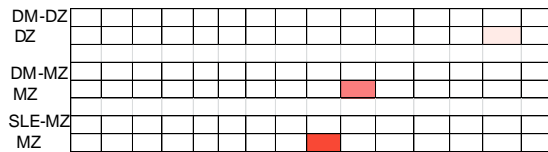

Supplement: MOESM4 [file 9510170]
